# Supplementary material
Source: PubMed Central journal article supplement (PMC3754751)
Supplement: JB.00686-13_zjb999092804so1.pdf [file JB.00686-13_zjb999092804so1.pdf]

1 **Supporting Information**

2 **Cytochrome *cd*<sub>1</sub> nitrite reductase NirS is involved in anaerobic magnetite**  
3 **biomineralization in *Magnetospirillum gryphiswaldense* and requires NirN for**  
4 **proper *d*<sub>1</sub> heme assembly**

5  
6 **Running title:** Nitrite reduction and magnetite biomineralization

7  
8 Yingjie Li<sup>a</sup>, Shilpa Bali<sup>b</sup>, Sarah Borg<sup>a</sup>, Emanuel Katzmann<sup>a</sup>, Stuart J. Ferguson<sup>b,#</sup>, and Dirk Schüler<sup>a,#</sup>

9 <sup>a</sup>Ludwig-Maximilians-Universität München, Department Biologie I, Mikrobiologie,  
10 Großhaderner Str. 2-4, 82152 Planegg-Martinsried, Germany;

11 <sup>b</sup>Department of Biochemistry, University of Oxford, South Parks Road, Oxford OX1 3QU, United  
12 Kingdom

13 **#To whom correspondence should be addressed.**

14 **Stuart J. Ferguson**, Department of Biochemistry, University of Oxford, South Parks Road, Oxford  
15 OX1 3QU, UK; Fax: +44 01865 275259; Tel: +44 01865 275240; E-mail:

16 [stuart.ferguson@bioch.ox.ac.uk](mailto:stuart.ferguson@bioch.ox.ac.uk);

17 **Dirk Schüler**, Biozentrum der LMU, Großhaderner Str.2-4, 82152 Planegg-Martinsried, Tel.:  
18 004989218074502; Fax: 004989218074515; E-mail: [dirk.schueler@lrz.uni-muenchen.de](mailto:dirk.schueler@lrz.uni-muenchen.de).

**A**

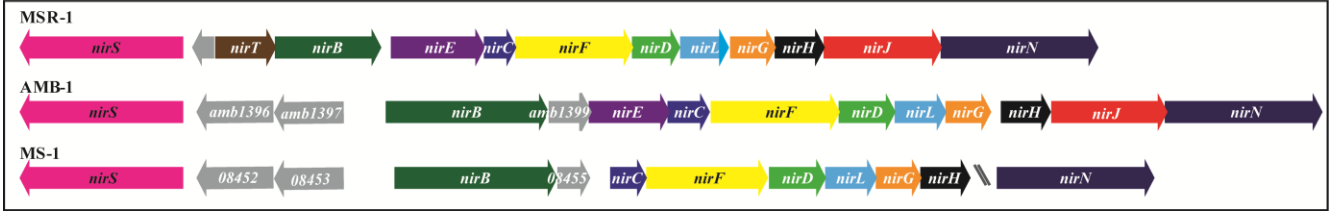

**B**

|              |                   |                |                     |                     |                     |                     |                  |                     |            |    |
|--------------|-------------------|----------------|---------------------|---------------------|---------------------|---------------------|------------------|---------------------|------------|----|
| Mgr_1052     | MLKGLRNALL        | LSVMP - MAMA   | TGAFANEAA -         | -----               | -----               | -----               | L                | TGATKDAAAK          | IYFERCAGCH | 49 |
| Amb1395      | MWKGVARNALL       | LTALP - FAMS   | GAFAAQEAT -         | -----               | -----               | -----               | L                | SKEAKEASAK          | IYFERCAGCH | 49 |
| Magn03008451 | -----             | -----          | GAFAAQEAT -         | -----               | -----               | -----               | L                | SKDAKEASAK          | IYFERCAGCH | 32 |
| PST_3532     | -MSNVGKPI L       | AGVIAGLSLL     | GLAVAQAAAP          | E -                 | -----               | -----               | M                | TAEKEAAKQ           | IYFERCAGCH | 51 |
| Amb4165      | --MKAAATWMM       | AALAV - -AWA   | GTAMAEKPA           | HGAGEHYETS          | GDQLRAAPMS          | QPGAQPGPQL          | SAAEFTRAKQ       | IYFERCAGCH          | 76         |    |
| PA14_06750   | --MPFGKPLV        | GTLASLSTLL     | GLATAHAKDD          | MKAAEQYQGA          | ASAVDPAHVV          | RTNG - -APDM        | SESEFNEAKQ       | IYFQRCAGCH          | 76         |    |
| Mgr_1052     | GVLKRGATGK        | NLEP - - - - - | -----AAT            | SKLGGQRLEK          | I IANGTEGGM         | VNFDD - - ILS       | KDEIKNMATY       | IQMPDPSPE           | 114        |    |
| Amb1395      | GVLKRGATGK        | NLEP - - - - - | -----ANT            | TKLGQARLEK          | I LTNGTGGM          | VNFDD - - ILS       | KDEIKNMATY       | IQMPDVPPE           | 114        |    |
| Magn03008451 | GVLKRGATGK        | NLEP - - - - - | -----ANT            | TKLGQARLEK          | I LTNGTGGM          | VNFDD - - ILS       | KDEIKNMATY       | IQMPDVPPE           | 97         |    |
| PST_3532     | GVLKRGATGK        | NLEPHWTKTD     | ADGKKTGEGT          | LNLGTRLEN           | I IAYGTEGGM         | VNYDD - - ILS       | KEEINMMARY       | IQNTDVPPE           | 129        |    |
| Amb4165      | GVLKRGATGK        | PLTT - - - - - | -----DIT            | RERGFDAKKA          | F I TYGSAAGM        | PNWGSSGQLS          | EAEDVLMAY        | LLNEPPQPE           | 143        |    |
| PA14_06750   | GVLKRGATGK        | PLTP - - - - - | -----DIT            | QQRGQVLEA           | L I TYGFPLGM        | PNWGSSGELS          | KEQITLMAY        | IQHTPPQPE           | 143        |    |
| Mgr_1052     | WGLADMKGSW        | KI IVPVDRP     | TKKMNNVND           | NVFSVTLRDS          | GEVALIDGDT          | KKIWNIVKTG          | YAVHISRISY       | SGRYVYVIGR          | 194        |    |
| Amb1395      | WGIKEMTASW        | KVTVKPEDRP     | KKQMNKVNK           | NVFSVTLRDT          | GEIALIDGDT          | KKIWTIKTG           | YAVHISRLSA       | SGRFVYVIGR          | 194        |    |
| Magn03008451 | WGIKEMTASW        | KVVVKPEDRP     | KKQLNKVNK           | NVFSVTLRDS          | GEIALIDGDT          | KKIWTIKTG           | YAVHISRLSA       | SGRFVYVIGR          | 177        |    |
| PST_3532     | FSLQDMKDSW        | KL IVPVDRP     | KKQMNKINLK          | NVFAITLRDA          | GKLALVDGDT          | HT IWKVLDTG         | YAVHISRLSA       | SGRYVYTVGR          | 209        |    |
| Amb4165      | FGMDEIKATW        | KVQIPADKRP     | ARKMNTLDLS          | NLFSVTLRDS          | GEIALIDGAS          | KNIVSIIKTG          | YAVHISRLSA       | SGRYLVYVIGR         | 223        |    |
| PA14_06750   | WGMPEMRESW        | KVLVKPEDRP     | KKQLNDLDP           | NLFSVTLRDA          | GQIALVDGDS          | KKIVKVIDTG          | YAVHISRMSA       | SGRYLLVIGR          | 223        |    |
| Mgr_1052     | DGKLDLIDLW        | MEKPQVAT I     | KTGLDARSVE          | TSKFKGYEDK          | Y I A G S Y W P P   | QYV I M D G L T L   | EPLK I V S T R G | NTVDG - EYHP        | 273        |    |
| Amb1395      | DGKLDLIDLW        | METPAVVAT I    | K I G M D A R S V E | TSKFKGFEDK          | Y A V A G S Y W P P | QYV I M D G A D L   | KPLK I V S T R G | I T V D G - EYHP    | 273        |    |
| Magn03008451 | DGKLDLIDLW        | METPAVVAT I    | K I G M D A R S V E | TSKFKGFEDK          | Y A V A G S Y W P P | QYV I M D G A D L   | KPLK I V S T R G | I T V D G - EYHP    | 256        |    |
| PST_3532     | DGLTT I DMW       | YEPTTVATV      | RLGSDARSVD          | TSKFKGYEDK          | Y L I G G T Y W P P | QYS I M D G E T L   | EPIK V V S T R G | Q T V D G - EYHP    | 288        |    |
| Amb4165      | DAK I N L I D L W | MEKPEVAEV      | K I G M E A R S V E | TSKFKGFEDK          | Y A I G A Y W P P   | QFV I M D G N T L   | EPK I V S T R G  | M T S D K Q E Y H P | 303        |    |
| PA14_06750   | DAR I D M I D L W | AKEPTKVAE I    | K I G I E A R S V E | S S K F K G Y E D R | Y T I G A Y W P P   | Q F A I M D G E T L | EPK I V S T R G  | M T V D T Q T Y H P | 303        |    |
| Mgr_1052     | EPRVASIVAS        | QIKPEFVVN      | KETGLIKLVD          | YTDIKNLKEV          | T I E S A K F L H D | GGWDASKRYF          | LVAANASNKV       | AVVDTKEGKL          | 353        |    |
| Amb1395      | EPRVASIVAS        | MIKPEWVIN      | KETGLIKLVD          | YSDIKNLKET          | T I E S A K F L H D | GGWDASKRYF          | LVAANASNKV       | AVVDTKDGL           | 353        |    |
| Magn03008451 | EPRVASIVAS        | MIKPEWVIN      | KETGLIKLVD          | YSDIKNLKET          | T I E S A K F L H D | GGWDASKRYF          | LVAANASNKV       | AVVDTKDGL           | 336        |    |
| PST_3532     | EPRVASIVAS        | HIKPEWVVN      | KETGQI I LVD        | YTDLKNLKT           | T I E S A K F L H D | GGWDYSKRYF          | MVAANASNKV       | AAVDTKTGKL          | 368        |    |
| Amb4165      | EPRVASIVAS        | HFKPEFVVN      | KETGLI L LVD        | YSDIKNLKVT          | S I E A E R F L H D | GGFDASKRYF          | LVAANARNKI       | AVVDTKEDKL          | 383        |    |
| PA14_06750   | EPRVAA I I A S    | HEHPEFIVN      | KETGKVLVNV          | YKIDNLTVT           | S I G A A P F L H D | GGWDSSHRYF          | MTAANNSNKV       | AVIDSKDRRL          | 383        |    |
| Mgr_1052     | AALVDTKSKP        | HPGRGANFVH     | PKFGPVWATS          | HLGADVITLI          | GTDP - - - - E      | KHPEFAWKVV          | EELKNHGSGS       | LFVKTHPKSS          | 428        |    |
| Amb1395      | AGLVDTKSKP        | HPGRGANFNH     | PKFGPVWATS          | HLGADVITLI          | GTDP - - - - A      | KHKDQAWKVV          | AELKNHGAGS       | LFVKTHPKSN          | 428        |    |
| Magn03008451 | AGLVDTKSKP        | HPGRGANFVH     | PKFGPVWATS          | HLGADVITLI          | GTDP - - - - A      | KHKDQAWKVV          | AELKNHGAGS       | LFVKTHPKSN          | 411        |    |
| PST_3532     | AALVDTAKIP        | HPGRGANFIH     | PQFGPVWTTG          | HLGDDVSLI           | S T A S D D P K Y A | KYKEHNWQVV          | QELKMPGAGN       | LFVKTHPKSK          | 448        |    |
| Amb4165      | VGMVEVGATP        | HPGRGTNFVH     | PKFGPVWATG          | HLGDDSVALI          | GTDP - - - - K      | GHPKQAWTKV          | ASLTGQGGGS       | LFLKTHPKSK          | 458        |    |
| PA14_06750   | SALVDVGKTP        | HPGRGANFVH     | PKYGPVWSTS          | HLGDGSLI            | GTDP - - - - K      | NHPQYAWKVV          | AELQGGGGGS       | LFIKTHPKSS          | 458        |    |
| Mgr_1052     | NLWADAPLMP        | EREAAESVTV     | YDINNLAAGP          | EVINVAKMAG          | LPESKAVKRT          | VHAEYNEAGD          | EVWFSIWAGK       | TEPSAIVVMD          | 508        |    |
| Amb1395      | NLWADAPLFP        | EKDMAESVTV     | YDINKLDKGP          | EVINIAKLAD          | LPETKAVKRA          | VQAEYNEKGD          | EVWFSIWAGK       | TDPSAIVVMD          | 508        |    |
| Magn03008451 | NLWADAPLFP        | EKDMAESVTV     | YDINKLDKGP          | EVINIAKLAD          | LPETKAVKRA          | VQAEYNEKGD          | EVWFSIWAGK       | TDPSAIVVMD          | 491        |    |
| PST_3532     | NLWADAPMNP        | EREVAESVTV     | YDLADLSKAP          | KRLDVAKDSG          | LPESKAIIRA          | THPEYNEAGD          | EVWI SLWGGK      | TDQSAI VIYD         | 528        |    |
| Amb4165      | NLWVDTTLNP        | DADVAASIAV     | FDINNLDPKA          | EVLPIAKWAG          | ISDG - - APRV       | VQPEYNKAGD          | EVWISVWNAK       | DKVSAI VVVD         | 536        |    |
| PA14_06750   | HLVVDTTFNP        | DARISQSVAV     | FDLKNLDAKY          | QVLPIAEWAD          | LGE - - AKRV        | VQPEYNKRGD          | EVWFSVWNGK       | NDSSALVVVD          | 536        |    |
| Mgr_1052     | DKTRKMKAVI        | KDPKLIPTPTG    | KFNVKNTQHD          | IY                  | 540                 |                     |                  |                     |            |    |
| Amb1395      | DKTRKVKAVI        | KDPKLIPTPTG    | KFNVTNTQHD          | IY                  | 540                 |                     |                  |                     |            |    |
| Magn03008451 | DKTRKVKAVI        | KDPKLIPTPTG    | KFNVTNTQHD          | IY                  | 523                 |                     |                  |                     |            |    |
| PST_3532     | DKTLKLVKVI        | TDPAIVTPTG     | KFNVTNTMHD          | VY                  | 560                 |                     |                  |                     |            |    |
| Amb4165      | DKTRKLVKVI        | KDPRLIPTPTG    | KFNVTNTLHD          | VY                  | 568                 |                     |                  |                     |            |    |
| PA14_06750   | DKTLKLVKAVV       | KDPRLIPTPTG    | KFNVTNTQHD          | VY                  | 568                 |                     |                  |                     |            |    |

C

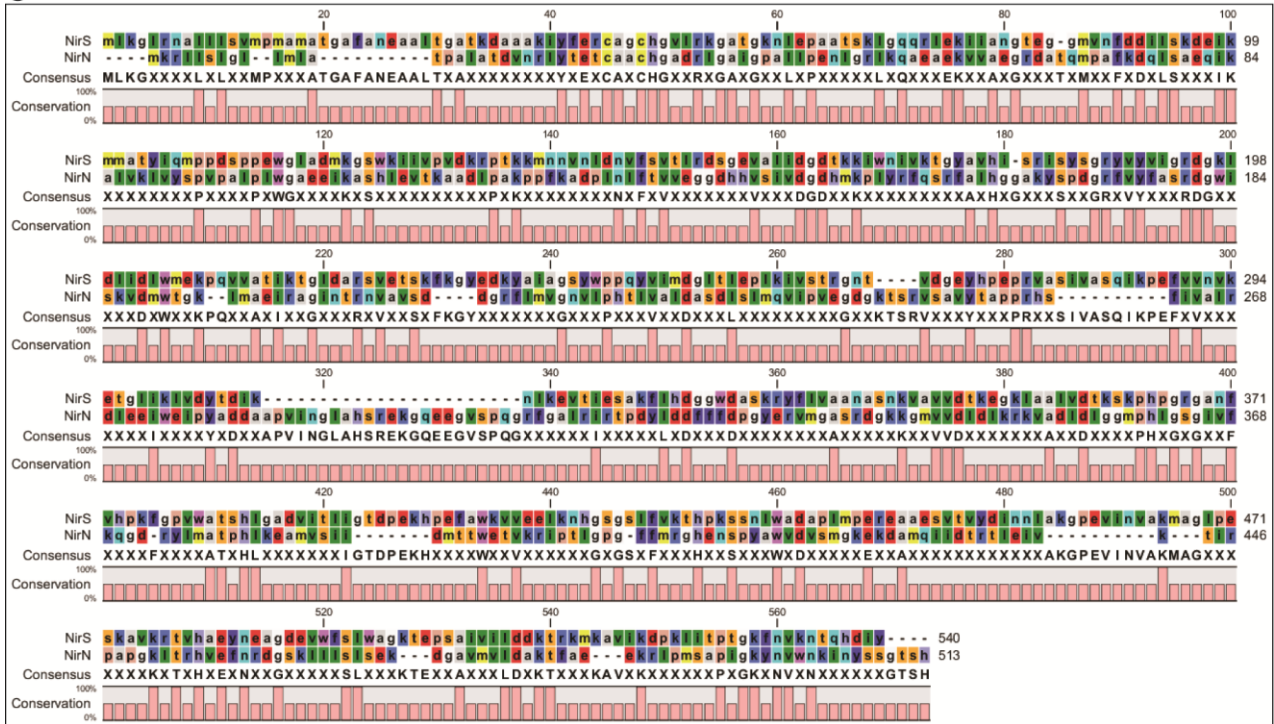

20

21 Fig. S1. (A) Molecular organization of identified *nir* genes in *Magnetospirillum magneticum* and  
 22 *Magnetospirillum magnetotacticum*. Double backslash represents *nirN* and other *nir* genes are found  
 23 in different contigs from the incomplete genome assembly in *M. magnetotacticum*. (B) Sequence  
 24 alignment of NirS with selected homologs from MTB and non-MTB. PST\_3532 and PA14\_06750  
 25 refer to NirS from *Pseudomonas stutzeri* A1501 and *Pseudomonas aeruginosa* UCBPP-PA14,  
 26 respectively. Conserved, homologous, and nonconserved residues among the various species are  
 27 shown in red, blue, and black, respectively. Residues involved in  $d_1$  heme binding site are indicated  
 28 by green star. Heme *c* binding site is shown in a black box. (C) Sequence alignment of NirS and  
 29 NirN from MSR-1. The level of conserved amino acid residues among the various species are shown  
 30 below the sequences. The residues of the alignment are color-coded according to the Rasmol colour  
 31 scheme (<http://life.nthu.edu.tw/~fmhsu/rasframe/COLORS.HTM#aminocolors>).

32 Compared to MSR-1, a similar *nir* cluster was observed in both *M. magneticum* and *M.*  
 33 *magnetotacticum* (Fig. S1A). While neither *nirS* nor other *nir* genes are present in *Magnetococcus*  
 34 *marinus* MC-1 (1), two homologs of *nirS* (*amb1395* and *amb4165*) are present in *M. magneticum*  
 35 (Table S1), thus being the only known bacterium having more than one *nirS* gene. As in MSR-1,  
 36 *amb1395* is part of a larger *nir* cluster and shares high amino acid similarity (91%) with NirS of both  
 37 MSR-1 (Mgr\_1052) and *M. magnetotacticum* (Magn03008451), respectively (Table S1), whereas  
 38 *amb4165* is more divergent (78% similarity to NirS of MSR-1) and not adjacent to other *nir* genes.  
 39 Also, the N-terminus of Amb4165 containing the heme *c*-binding region differs from that of other

40 magnetobacterial NirS homologs, but rather resembles NirS from *Ps. aeruginosa*, whereas in NirS  
41 from *Ps. stutzeri* this region is absent (Fig. S1B) (2).

42 In *M. magneticum* and *M. magnetotacticum*, *nirCFDLGH* genes also show synteny. However,  
43 compared to MSR-1 their *nir* clusters also display some differences (Fig. S1A): First, in *M.*  
44 *magnetotacticum* and *M. magneticum* *nirT* and *nirB* genes are fused into a single gene designated as  
45 *nirB*. Second, in *M. magneticum* and *M. magnetotacticum* an additional gene (*amb1399* and  
46 *magn03008455*) encoding a copper-binding protein of plastocyanin/azurin family is present between  
47 *nirB* and *nirE*. Third, *nirJ* is missing in *M. magnetotacticum*, probably due to the incompleteness of  
48 its genome assembly. Fourth, *nirE* encoding an S-adenosylmethionine (SAM)-dependent  
49 uroporphyrinogen methyltransferase is absent from *M. magnetotacticum*. The monocistronic  
50 organization of *nirS* encoding a cytochrome *cd<sub>1</sub>* nitrite reductase in MSR-1 and other magnetospirilla  
51 is unique compared to all other non-magnetic denitrifiers in which *nirS* is part of a single operon  
52 along with other *nir* genes. In magnetospirilla we found all other *nir* genes (*nirTBECFDLGHJN*)  
53 within a closely adjacent, but distinct cluster, which encodes a set of proteins likely required for  
54 synthesis of *d<sub>1</sub>* heme. This different organization might reflect a somewhat distinct regulation or  
55 function of magnetobacterial nitrite reduction proteins.

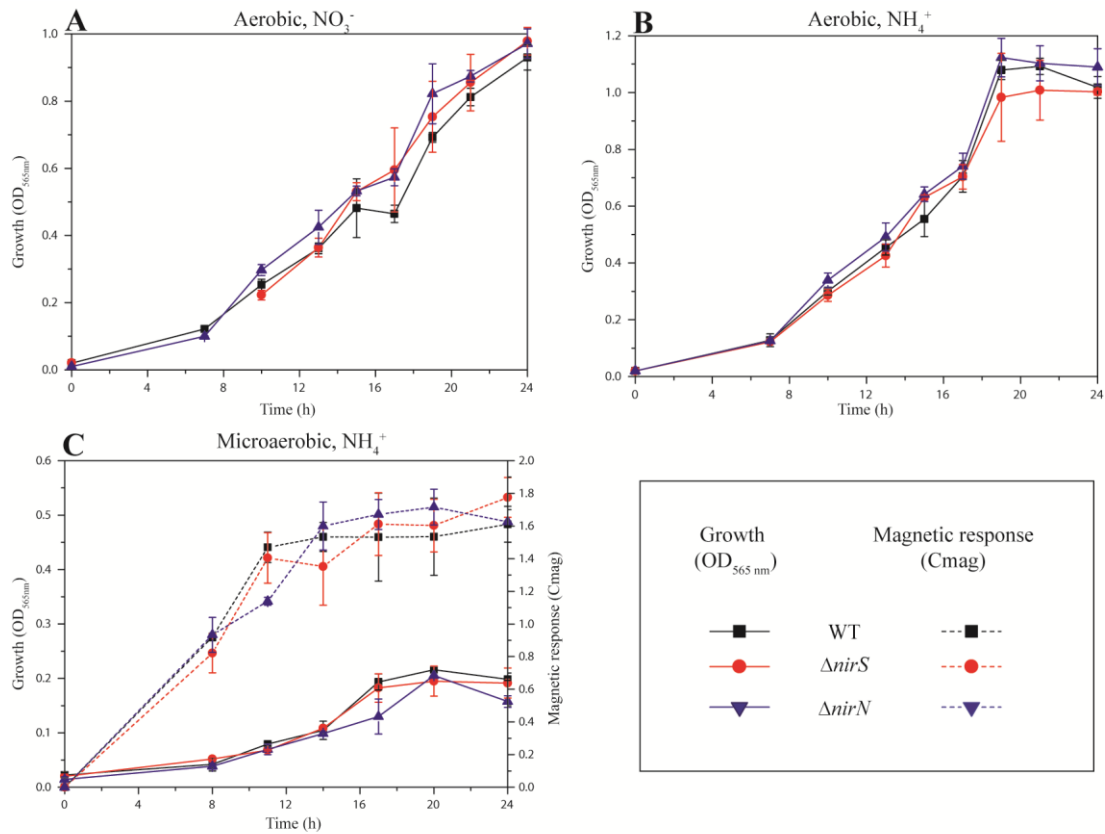

56

57 Fig. S2. Growth ( $\text{OD}_{565\text{ nm}}$ ) and magnetic response ( $C_{\text{mag}}$ ) of MSR-1 WT,  $\Delta nirS$ , and  $\Delta nirN$  under  
 58 different conditions at  $30^\circ\text{C}$ . Under aerobic conditions, the  $C_{\text{mag}}$  values were always zero and not  
 59 shown. (A) Aerobic, nitrate medium; (B) Aerobic, ammonium medium; (C) Microaerobic,  
 60 ammonium medium. Results from representative experiments were measured in triplicate, and values  
 61 are given as means and standard deviations.

|              |            |             |            |             |             |            |            |             |     |
|--------------|------------|-------------|------------|-------------|-------------|------------|------------|-------------|-----|
| Mgr_0419     | -----      | -----       | -----mk    | r--llslgll  | mlatpal-at  | dvnrlytetc | aachgadrig | aigpallpen  | 49  |
| Amb_1408     | msifdlssra | lrgisarsav  | rvllrrarmg | slilpmvvgmt | ilatptlaae  | daprlyaehc | aachggdrig | aigpallpen  | 80  |
| Magn03008348 | -----      | -----       | -----      | ---mvvgmt   | vlatpaqave  | daprlyaehc | aachggdrig | aigpallpen  | 46  |
| BAA12683     | -----      | -----       | -----m     | rliglalgl   | lgalaqagea  | pgealyrqhc | qachgagr   | gsgptllpes  | 51  |
| AAZ43116     | -----      | mqli---pa   | lvlaaalpaa | tfvaldlalp  | -raaaatqpt  | dsqalyeqhc | qschgvnr   | gagpallpes  | 65  |
| Pden_2495    | -----      | -----       | ---mir-    | ---ptaffsl  | llalplitaha | dpaadyaehc | aachgedrig | gtgpallpet  | 50  |
|              |            |             |            |             |             |            |            |             |     |
| Mgr_0419     | lgrlkqaeae | kvvaegrdat  | qmpafkdqls | aeqikalvkl  | vysvpvapl   | wgaeekash  | levtkaadlp | akppfkadpl  | 129 |
| Amb_1408     | lgrlrkaeae | kvlaqgrpat  | qmpahgdkl  | aeqikalae   | vftplaavpa  | wgmaekasr  | vinvdpaslp | akpqwntdpl  | 160 |
| Magn03008348 | lgrlrkaeae | tviargraat  | qmpahgdkl  | peqikalae   | vftplaavpv  | wgmeerasr  | vvnvdpdqlp | srpqwdadpl  | 126 |
| BAA12683     | lsrlkpaqar | evllhgrpat  | qmagfagqld | daaadlvay   | lyqapprepq  | wsaedirasq | vqphplatlp | srprfeadpl  | 131 |
| AAZ43116     | lsrlkpaeah | svlrdgrpas  | qmaayshvln | daqitglvdy  | lyqpaavppt  | wsdadiras  | riikdvatlp | tapqhgdpr   | 145 |
| Pden_2495    | lgrvrgi--d | tviaqgrvst  | qmegfadr   | pesitalvdy  | vtapldhrp   | wsaeqiaasr | emnpdy-qp  | ekpvfaadpl  | 127 |
|              |            |             |            |             |             |            |            |             |     |
| Mgr_0419     | nlfvveggd  | hhvsivdgdh  | mkplyrfqsr | fahggakys   | pdgrfvyfas  | rdgwiskvdm | wtgklmaeir | agintrnvav  | 209 |
| Amb_1408     | nlfvvetgd  | hhvtildges  | fkpltrfqsr | fahggakys   | pdgrfvyfas  | rdgwiktydl | ytliqvaeir | agvntnvav   | 240 |
| Magn03008348 | nlfvvetgd  | hhvtildgds  | fkplarfqs  | fahggakys   | pdgrfvyfas  | rdgwiktydl | ysliqvaeir | agvntnvav   | 206 |
| BAA12683     | nlfvvesgd  | hhvtildgdr  | fepiarfqs  | fahggpkfs   | pdgrlvyfas  | rdgwtlydl  | ynlkvvaevr | aglntrnlav  | 211 |
| AAZ43116     | nlfvvesag  | hhvrvldgdr  | feelanfqsh | fahggpkfs   | pdgrfvyfas  | rdgwisvdyd | hnlcmiae   | aglntrnlav  | 225 |
| Pden_2495    | nitlvvetgd | hhsvldgdt   | fevlarfatp | fahggpkfs   | pdgrfvyims  | rdgwwqkydi | wslaevgrir | aalnsrniai  | 207 |
|              |            |             |            |             |             |            |            |             |     |
| Mgr_0419     | sddgrflmvg | nlphtlval   | dasdlsImqv | ipvegd-gkt  | srvsavytap  | prhsfivalr | dleelweipy | addaapving  | 288 |
| Amb_1408     | shdgrflmvg | nlphtlval   | dardltplqv | ipvvgdagat  | srvsavytap  | prsfvvalk  | dlepweipy  | addagpvmng  | 320 |
| Magn03008348 | shdgrflmvg | nlphtlval   | dardltplqv | ipvmgdagat  | srvsavytap  | prsfvvalk  | diaevweipy | addagpvmng  | 286 |
| BAA12683     | sdhgrwvlvg | nylpgnlvll  | dardlslvqv | ipaadaqqga  | srvsavytap  | prhsfvalk  | dvhelweipy | angk-----   | 285 |
| AAZ43116     | sndgrwvlvg | nylpgnlvll  | dardlslikh | iptvgqdgtp  | srvsavytap  | prdsfvvalk | dvqeawelsy | agep-----   | 299 |
| Pden_2495    | spdgqriava | nylpestiil  | ds-dlnplrl | iatq-vdgtp  | srvsavyqap  | qrhsfvvalk | dapeiwevat | td-----     | 277 |
|              |            |             |            |             |             |            |            |             |     |
| Mgr_0419     | lahsrekqge | egvspqgrfg  | alrirtpdyl | ddfffppgye  | rvmgasrdgk  | kgmvdldik  | rkvaiddlgg | mphilgsgl   | 368 |
| Amb_1408     | fvhsyekghe | egispqgrfq  | airiripdf  | ddfffdrtye  | ramgasrdgt  | kglvvdldik | rkvaiddlpg | mphilgsglif | 400 |
| Magn03008348 | fvhsyekghe | egispqgrfq  | airiripdf  | ddfffdrtye  | rvmgasrdgt  | kglvvdldik | rkvaiddlpg | mphilgsglif | 366 |
| BAA12683     | -----      | -----pva    | pkrlavadyl | ddffsfpydr  | yllgssrqar  | ggevieldsg | arvasipls  | mphilgsglyw | 348 |
| AAZ43116     | -----      | -----tfe    | prrikaadyl | ddffsfpydr  | yllatsrkah  | ggqvldldtg | kavtdiplpg | mphilgsglyw | 362 |
| Pden_2495    | -----      | -----ls     | lrripidepl | ddffsfpydr  | qliganrdgd  | kgvaiddldg | hkvaeldlpg | mphilgsgltw | 339 |
|              |            |             |            |             |             |            |            |             |     |
| Mgr_0419     | kqgdrylmat | phlkeamvs   | idmttwetvk | riptlpggff  | mrghenspya  | wvdvsmgkek | damqidtrt  | leivktlrpa  | 448 |
| Amb_1408     | akdghdymat | phlkeavvs   | idmqtwtvk  | riptlpggff  | mrshentgya  | widvsmgkek | daiqidlsa  | meivrtlrpa  | 480 |
| Magn03008348 | kkdgrdfmat | phlkeavvs   | idmstwtvk  | riptlpggff  | mrshentgya  | widvsmgkek | daiqidlda  | meivrtlrpa  | 446 |
| BAA12683     | krdgrwvfat | pnisrgvis   | idlqnwklk  | eivtdggpff  | mrshadspya  | wtdtflgkhh | deillidkqt | leiahrlrps  | 428 |
| AAZ43116     | krdgkwvfat | pnvskglis   | ldletwklk  | eiptegpff   | mrsganspya  | wtdvffgpnn | davhldkqt  | levahtlrpm  | 442 |
| Pden_2495    | erdgrvrmat | philgegvlsv | idmqdwslvk | qiktsppgff  | lrg hatspyv | wadvffgphk | demhvidkqt | leivktlapf  | 419 |
|              |            |             |            |             |             |            |            |             |     |
| Mgr_0419     | pgkltrhvef | nrdgsklls   | lsekdgavmv | ldaktfaeek  | rlpmsapigk  | ynvwnkinys | sgtsh      |             | 513 |
| Amb_1408     | pgrttahaef | drsgkhvlls  | vmeaegeliv | fdaesfevvt  | rmpmkrvpgk  | ynvfnkinys | sgtsh      |             | 545 |
| Magn03008348 | agrttahaef | drsgrhvlls  | vmeaegeliv | fdaqsfevvt  | rmpmkrvpgk  | ynvfnkinys | sgtsh      |             | 511 |
| BAA12683     | pgkvaghvef | trdgryalls  | vwdrdgalvv | ydahsleevk  | rlpnmkpsgk  | ynvgnkigya | egtsh      |             | 493 |
| AAZ43116     | pgknaahvef | tdgryalls   | vwdtdgallv | ydantleevk  | rlpnmkpsgk  | ynvgnkiefa | egtsh      |             | 507 |
| Pden_2495    | pgqtfahsef | trdgshvlsv  | lwedegavvi | ydaktldevk  | rlpnrkpsgk  | ynvwnkitfe | dgtsh      |             | 484 |

62

63 Fig. S3. Sequence alignment of NirN with selected homologs from MTB and non-MTB. PST\_3538,  
64 PA14\_06650, and Pden\_2495 refer to NirN from *Pseudomonas stutzeri* A1501, *Pseudomonas*  
65 *aeruginosa* UCBPP-PA14, and *Paracoccus denitrificans* PD1222, respectively. Conserved,  
66 homologous, and nonconserved residues among the various species are shown in red, blue, and black,  
67 respectively.

68 **Table S1** Bacterial strains used in this work

| Strain                             | Important feature (s)                                                                                                                                                                                                       | Source or reference                       |
|------------------------------------|-----------------------------------------------------------------------------------------------------------------------------------------------------------------------------------------------------------------------------|-------------------------------------------|
| <i>E. coli</i> strain DH5 $\alpha$ | F' $\Phi$ 80dlacZ $\Delta$ M15 $\Delta$ (lacZYA-argF)U169 <i>deoR</i><br><i>recA1 endA1 hsdR17</i> (r <sub>k</sub> <sup>-</sup> , m <sub>k</sub> <sup>+</sup> ) <i>phoA supE44</i> $\lambda$ -<br><i>thi-1 gyrA96 relA1</i> | Invitrogen                                |
| <i>E. coli</i> strain BW29427      | <i>dap</i> auxotroph derivative of <i>E. coli</i> strain B2155                                                                                                                                                              | K. Datsenko and B. L. Wanner, unpublished |
| <i>Ps. stutzeri</i>                | Wild type                                                                                                                                                                                                                   | H. Jung                                   |
| MSR-1 WT                           | Wild type R3/S1, but Rif <sup>r</sup> , Sm <sup>r</sup>                                                                                                                                                                     | (3)                                       |
| $\Delta$ <i>nirS</i>               | R3/S1 $\Delta$ <i>nirS</i>                                                                                                                                                                                                  | This study                                |
| $\Delta$ <i>nirN</i>               | R3/S1 $\Delta$ <i>nirN</i>                                                                                                                                                                                                  | This study                                |

69

70 **Table S2** Plasmids used in this work

| Plasmid    | Important feature (s)                                                                          | Source or reference            |
|------------|------------------------------------------------------------------------------------------------|--------------------------------|
| pCM184     | Broad-host-range allelic exchange vector, Amp <sup>r</sup> , Km <sup>r</sup> , Tc <sup>r</sup> | (4)                            |
| pBBR1MCS-2 | Km <sup>r</sup> , mobilizable broad-host-range vector                                          | (5)                            |
| pBBR1MCS-3 | Tc <sup>r</sup> , mobilizable broad-host-range vector                                          | (5)                            |
| pK19mobGII | -                                                                                              | (6)                            |
| pFM208     | Km <sup>r</sup>                                                                                | F. D. Müller, unpublished data |
| pRU1       | Km <sup>r</sup>                                                                                | R. Uebe, unpublished data      |
| pCM157     | Tc <sup>r</sup> , Cre recombinase expression vector                                            | (4)                            |
| pLYJ06     | pCM184 plus <i>nirS</i> 2-kb downstream region                                                 | This study                     |
| pLYJ08     | pLYJ06 plus <i>nirS</i> 2-kb upstream region                                                   | This study                     |
| pLYJ20     | pCM184 plus <i>nirN</i> 2-kb upstream region                                                   | This study                     |
| pLYJ23     | pLYJ06 plus <i>nirN</i> 2-kb downstream region                                                 | This study                     |
| pLYJ36     | pBBR1MCS-2 plus <i>nirS</i> promoter region                                                    | This study                     |
| pLYJ51     | pBBR1MCS-2 plus <i>nirS</i> with its own promoter                                              | This study                     |
| pLYJ52     | pBBR1MCS-2 plus <i>nirS</i> without its candidate signal peptide sequence                      | This study                     |
| pLYJ59     | pLYJ52 with <i>nirS</i> promoter and signal peptide sequence                                   | This study                     |
| pLYJ64     | pLYJ59 plus <i>mcherry</i>                                                                     | This study                     |
| pLYJ74     | pRU1 plus <i>nirN</i>                                                                          | This study                     |
| pLYJ86     | pCM157 plus <i>nirS</i> promoter region from pLYJ36                                            | This study                     |
| pLYJ87     | pBBR1MCS-2 plus <i>nirS</i> promoter and <i>cre</i> fusion from pLYJ86                         | This study                     |
| pLYJ88     | pLYJ36 plus <i>amb1395</i> from <i>M. magneticum</i>                                           | This study                     |
| pLYJ89     | pLYJ36 plus <i>amb4165</i> from <i>M. magneticum</i>                                           | This study                     |
| pLYJ94     | pLYJ97 plus <i>nirS</i> promoter region                                                        | (7)                            |
| pLYJ95     | pLYJ36 plus <i>nirS</i> from <i>P. stutzeri</i>                                                | This study                     |
| pLYJ97     | pBBR1MCS-2 plus <i>gusA</i> from pK19mobGII                                                    | (7)                            |
| pLYJ104    | pLYJ97 plus <i>nirTBECFDLGHJN</i> promoter region                                              | This study                     |
| pLYJ113    | pRU1 plus <i>nirN</i> from <i>M. magneticum</i>                                                | This study                     |
| pLYJ124    | pRU1 plus <i>nirN</i> from <i>P. stutzeri</i>                                                  | This study                     |



71 **Table S3** BlastP analysis results of denitrification genes in MTB and non-MTB using MSR-1 as a query.

| Gene in MSR-1    | Encoded gene product<br>(aa, kDa, pI)         | <i>M. magneticum</i><br>(e-value, similarity)      | <i>M. magnetotacticum</i><br>(e-value, similarity) | Best hit in non-MTB<br>(e-value, similarity)             |
|------------------|-----------------------------------------------|----------------------------------------------------|----------------------------------------------------|----------------------------------------------------------|
| <i>mgr_1052*</i> | Nitrite reductase, NirS<br>(540, 59.26, 8.81) | <i>amb1395</i> (0, 91%)<br><i>amb4165</i> (0, 78%) | <i>magn03008451</i><br>(0, 91%)                    | <i>Dechlorosoma suillum</i> PS<br>(0, 90%)               |
| <i>mgr_1053</i>  | NirT<br>(199, 22.62, 8.38)                    | <i>amb1398</i><br>(6e-110, 89%)                    | <i>magn03008454</i><br>(2e-108, 91%)               | <i>Endoriftia Persephone</i><br>(2e-93, 79%)             |
| <i>mgr_1055</i>  | NirB<br>(341, 36.22, 8.41)                    | <i>amb1398</i><br>(3e-161, 81%)                    | <i>magn03008454</i><br>(1e-149, 77%)               | <i>Endosymbiont of Riftia pachyptila</i><br>(2e-99, 67%) |
| <i>jn634764</i>  | NirE<br>(304, 32.12, 6.86)                    | <i>amb1400</i><br>(1e-91, 77%)                     | –                                                  | <i>Pectobacterium wasabiae</i> WPP163<br>(3e-85, 69%)    |
| <i>mgr_0426</i>  | NirC<br>(104, 11.05, 7.83)                    | <i>amb1401</i><br>(4e-29, 73%)                     | <i>magn03008456</i><br>(2e-31, 76%)                | <i>Dechloromonas aromatica</i> RCB<br>(2e-30, 70%)       |
| <i>mgr_0425</i>  | NirF<br>(387, 42.85, 6.27)                    | <i>amb1402</i><br>(0, 82%)                         | <i>magn03008457</i><br>(0, 82%)                    | <i>Thiobacillus denitrificans</i><br>(7e-179, 79%)       |
| <i>mgr_0424</i>  | NirD<br>(149, 16.39, 5.22)                    | <i>amb1403</i><br>(2e-56, 74%)                     | <i>magn03008458</i><br>(6e-59, 77%)                | <i>Pseudomonas aeruginosa</i> PAO1<br>(4e-47, 68%)       |
| <i>mgr_0423</i>  | NirL<br>(165, 18.51, 8.97)                    | <i>amb1404</i><br>(2e-69, 77%)                     | <i>magn03008459</i><br>(5e-66, 75%)                | <i>Dechloromonas aromatica</i> RCB<br>(3e-54, 71%)       |

|                  |                    |                    |                     |                                     |
|------------------|--------------------|--------------------|---------------------|-------------------------------------|
| <i>mgr_0422</i>  | NirG               | <i>amb1405</i>     | <i>magn03008460</i> | <i>Beggiatoa sp.</i> PS             |
|                  | (148, 16.33, 5.41) | (7e-59, 73%)       | (3e-56, 72%)        | (3e-61, 74%)                        |
| <i>mgr_0421</i>  | NirH               | <i>amb1407</i>     | <i>magn03008461</i> | <i>Rubrivivax gelatinosus</i> IL144 |
|                  | (161, 17.60, 9.29) | (2e-70, 80%)       | (3e-71, 78%)        | (5e-63, 71%)                        |
| <i>mgr_0420</i>  | NirJ               | 1530431-1531552 bp | –                   | <i>Dechloromonas aromatica</i> RCB  |
|                  | (375, 41.28, 7.16) | (2e-155, 72%)      |                     | (1e-75, 76%)                        |
| <i>mgr_0419*</i> | NirN               | <i>amb1408</i>     | <i>magn03008348</i> | <i>Dechloromonas aromatica</i> RCB  |
|                  | (513, 56.40, 6.72) | (0, 83%)           | (0, 84%)            | (0, 73%)                            |

72 \*indicate genes deleted.

73 **References**

- 74 1. **Schübbe S, Williams T, Xie G, Kiss H, Brettin T, Martinez D, Ross C, Schüler D,**  
75 **Cox B, Nealson K, Bazylinski D.** 2009. Complete genome sequence of the  
76 chemolithoautotrophic marine *magnetotactic coccus* strain MC-1. Appl. Environ.  
77 Microbiol. **75**:4835-4852.
- 78 2. **Jüngst A, Wakabayashi S, Matsubara H, Zumft WG.** 1991. The *nirSTBM* region  
79 coding for cytochrome *cd*<sub>1</sub>-dependent nitrite respiration of *Pseudomonas stutzeri*  
80 consists of a cluster of mono-, di-, and tetraheme proteins. FEBS Lett. **279**:205-209.
- 81 3. **Schultheiss D, Kube M, Schüler D.** 2004. Inactivation of the flagellin gene *flaA* in  
82 *Magnetospirillum gryphiswaldense* results in nonmagnetotactic mutants lacking  
83 flagellar filaments. Appl. Environ. Microbiol. **70**:3624-3631.
- 84 4. **Marx C, Lidstrom M.** 2002. Broad-host-range *cre-lox* system for antibiotic marker  
85 recycling in Gram-negative bacteria. BioTechniques **33**:1062-1067.
- 86 5. **Kovach ME, Elzer PH, Hill DS, Robertson GT, Farris MA, Roop RM, Peterson**  
87 **KM.** 1995. Four new derivatives of the broad-host-range cloning vector pBBR1MCS,  
88 carrying different antibiotic-resistance cassettes. Gene **166**:175-176.
- 89 6. **Katzen F, Becker A, Ielmini MV, Oddo CG, Ielpi L.** 1999. New mobilizable vectors  
90 suitable for gene replacement in gram-negative bacteria and their use in mapping of  
91 the 3' end of the *Xanthomonas campestris pv. campestris gum* operon. Appl. Environ.  
92 Microbiol. **65**:278-282.
- 93 7. **Li Y, Katzmann E, Borg S, Schüler D.** 2012. The periplasmic nitrate reductase Nap  
94 is required for anaerobic growth and involved in redox control of magnetite  
95 biomineralization in *Magnetospirillum gryphiswaldense*. J. Bacteriol. **194**:4847-4856.

96

97
